# Supplementary material
Source: PubMed Central journal article supplement (PMC4648653)
Supplement: NIHMS717332-supplement-supplement_1.pdf [file NIHMS717332-supplement-supplement_1.pdf]

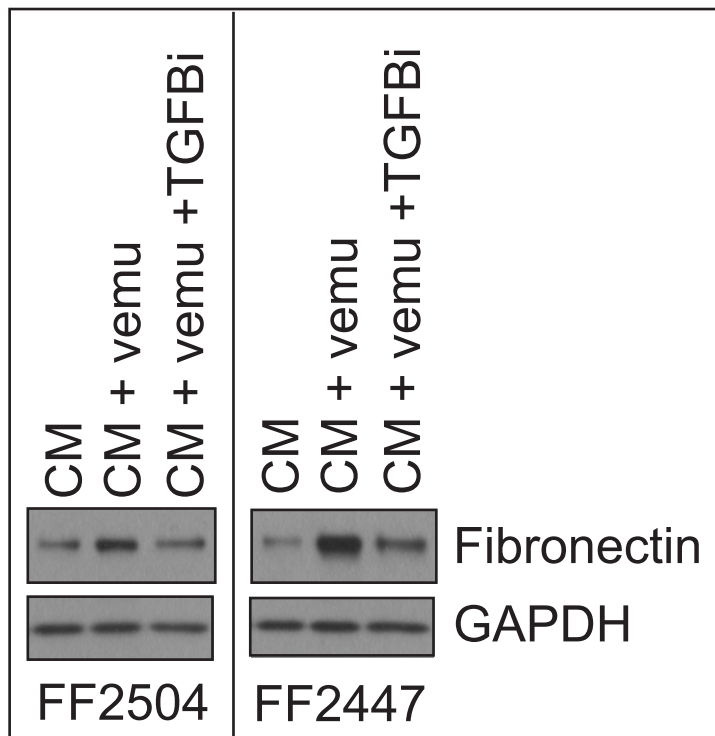

**Supplementary Figure 1. Inhibition of TGF $\beta$  partially suppressed fibroblast activation.** Western blot of FF2504 and FF2447 fibroblast cultures treated with either conditioned media from 1205Lu cells (CM), conditioned media from 1205Lu cells treated with 3 $\mu$ M vemurafenib for 48 hours (CM+vemu), or conditioned media from 1205Lu cells treated with 3 $\mu$ M vemurafenib for 48 hours containing SB505124 (CM+vemu+ TGF $\beta$ i).

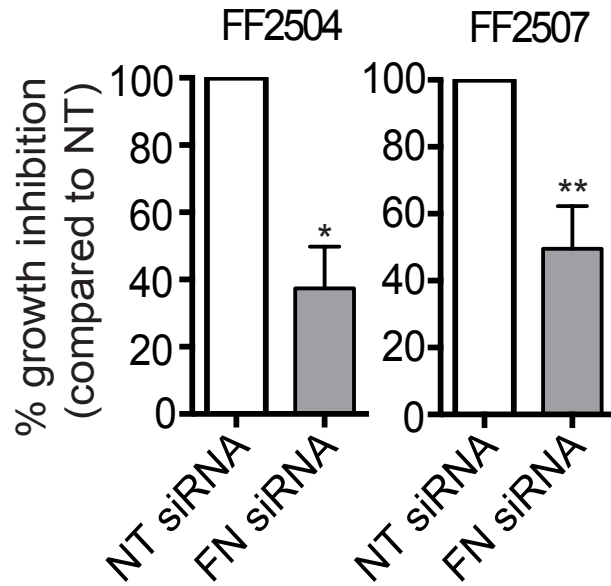

**Supplementary Figure 2. FN is required for optimal growth and survival of human primary skin fibroblasts under stress-inducing conditions.** FF2507 primary skin fibroblasts were treated with either non-targeting (NT) or FN (FN) siRNA prior to serum starvation (72hours). Cell viability was assessed using Alamar Blue assay, and percentage of growth inhibition was normalized to the NT control.

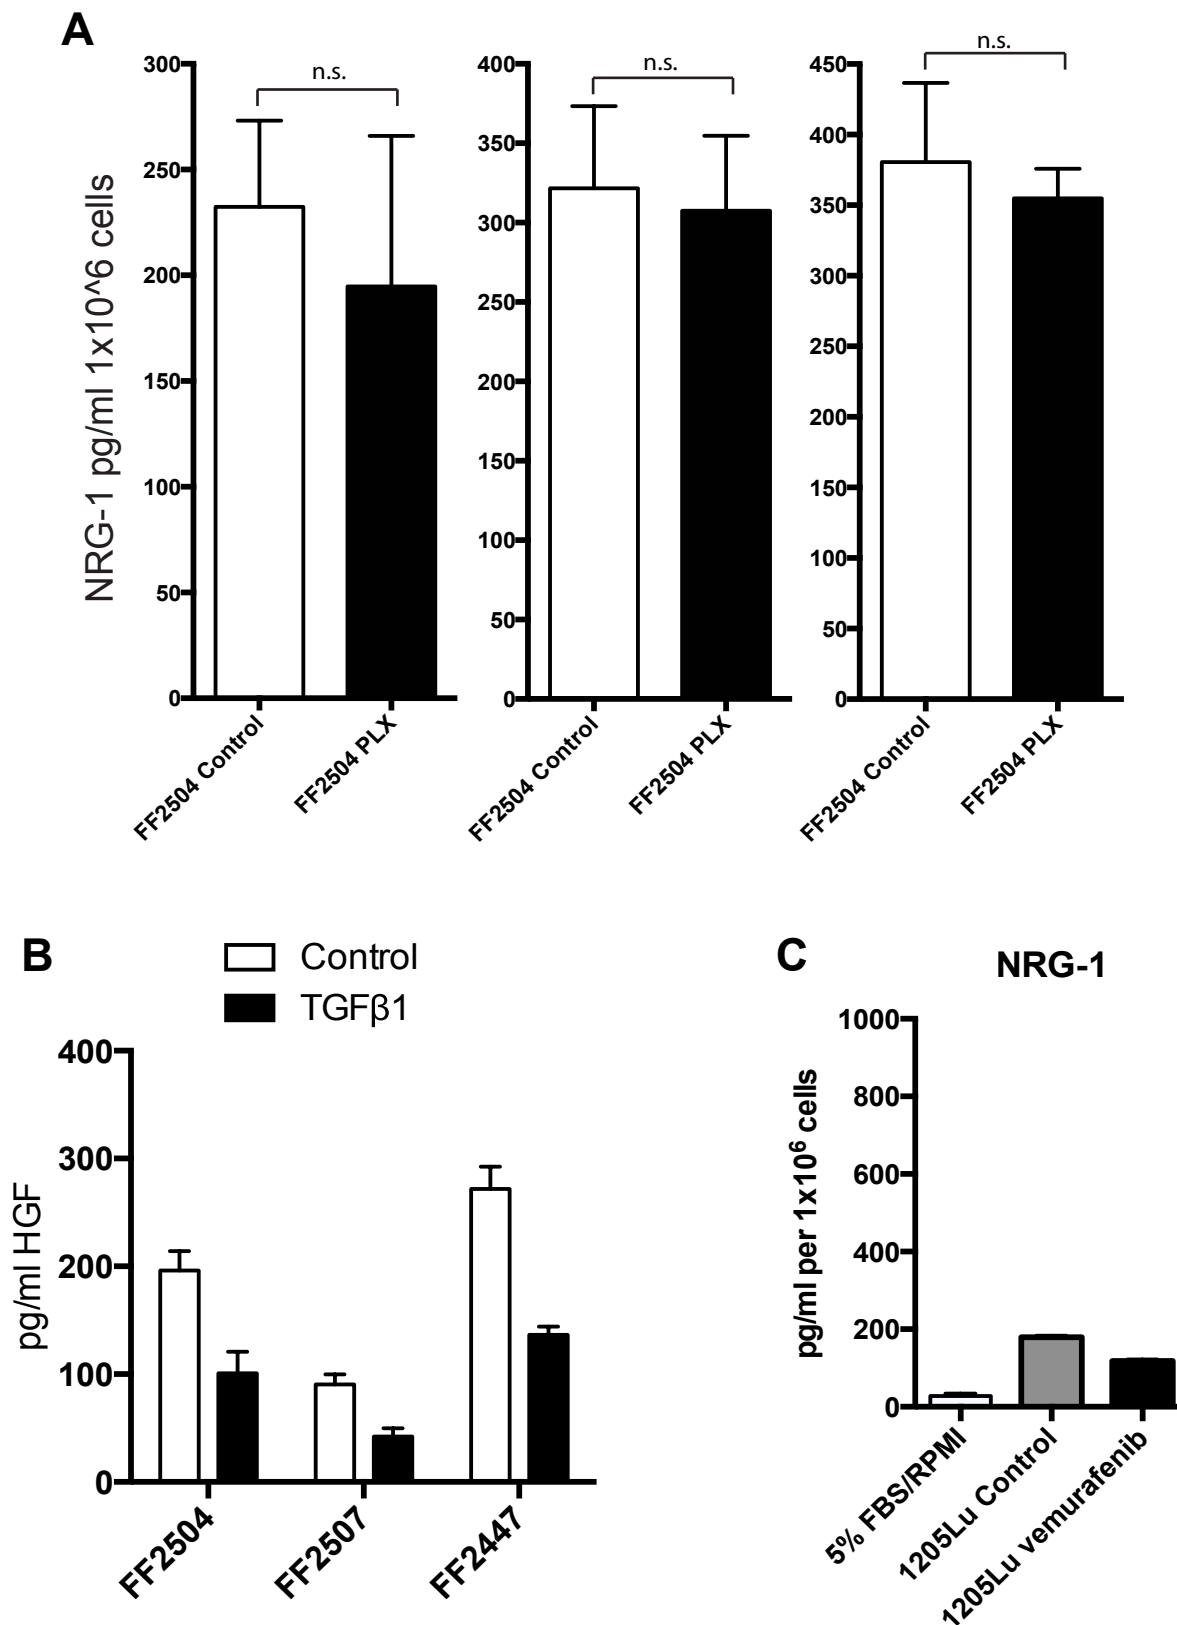

**Supplementary Figure 3. Vemurafenib and TGF $\beta$ 1 do not have the same stimulatory effects on fibroblasts.** **A.** Vemurafenib does not induce NRG release from fibroblasts. ELISA data showing NRG release from 3 human skin fibroblast cell lines, following treatment with 3 $\mu$ M vemurafenib for 72 hours. **B.** TGF $\beta$ 1 does not induce HGF release from fibroblasts. ELISA data showing HGF release from 3 human skin fibroblast cell lines, following treatment with 3 $\mu$ M vemurafenib for 72 hours. **C.** Melanoma cells do not secrete NRG-1 in response to vemurafenib. ELISA data showing NRG release from 1205Lu melanoma cell line, following treatment with 3 $\mu$ M vemurafenib for 72 hours.

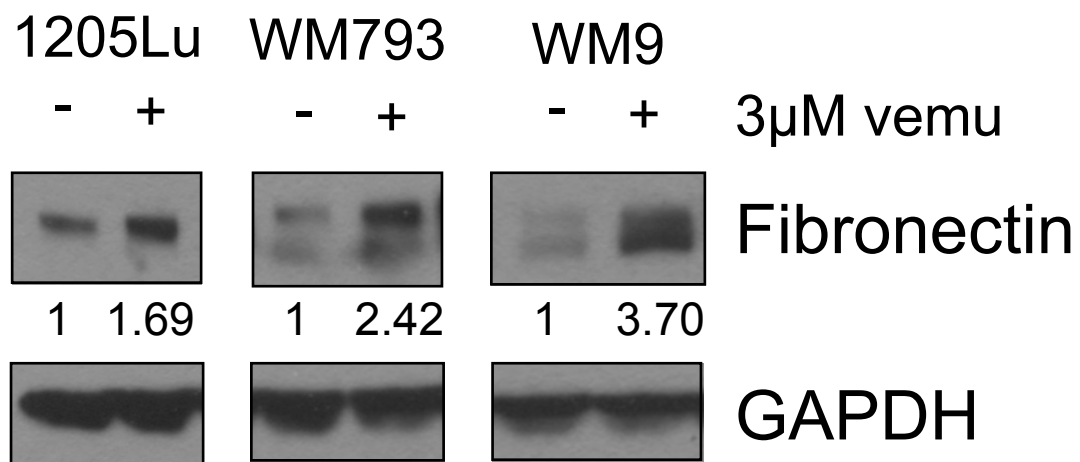

**Supplementary Figure 4. FN induction in melanoma cells in response to vemurafenib.** Western blot data showing FN upregulation from 3 BRAFV600E human melanoma cell lines, following treatment with 3 $\mu$ M vemurafenib for 48 hours.

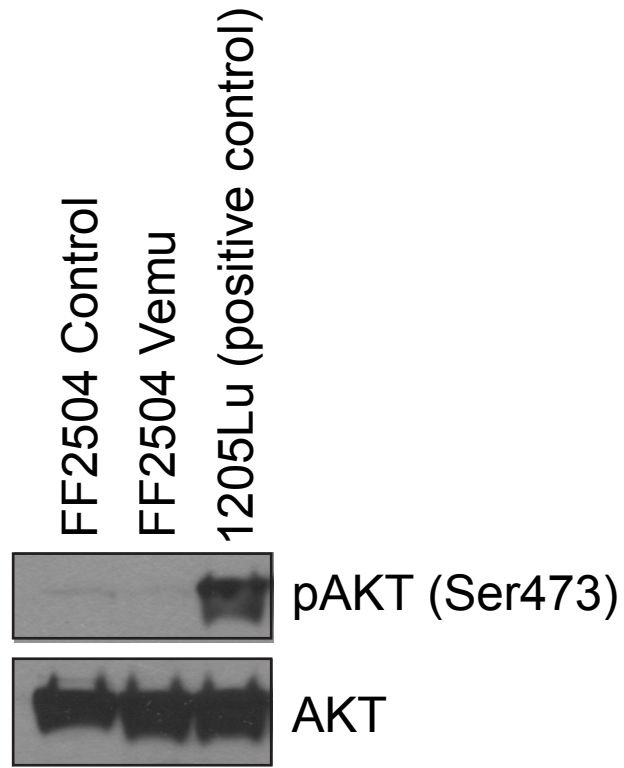

**Supplementary Figure 5. Vemurafenib does not induce pAKT in primary skin fibroblasts.** Western blot data showing pAKT and AKT levels in FF2504 primary skin fibroblasts following treatment with 3 $\mu$ M vemurafenib for 24 hours. 1205Lu basal lysate is included as a positive control.

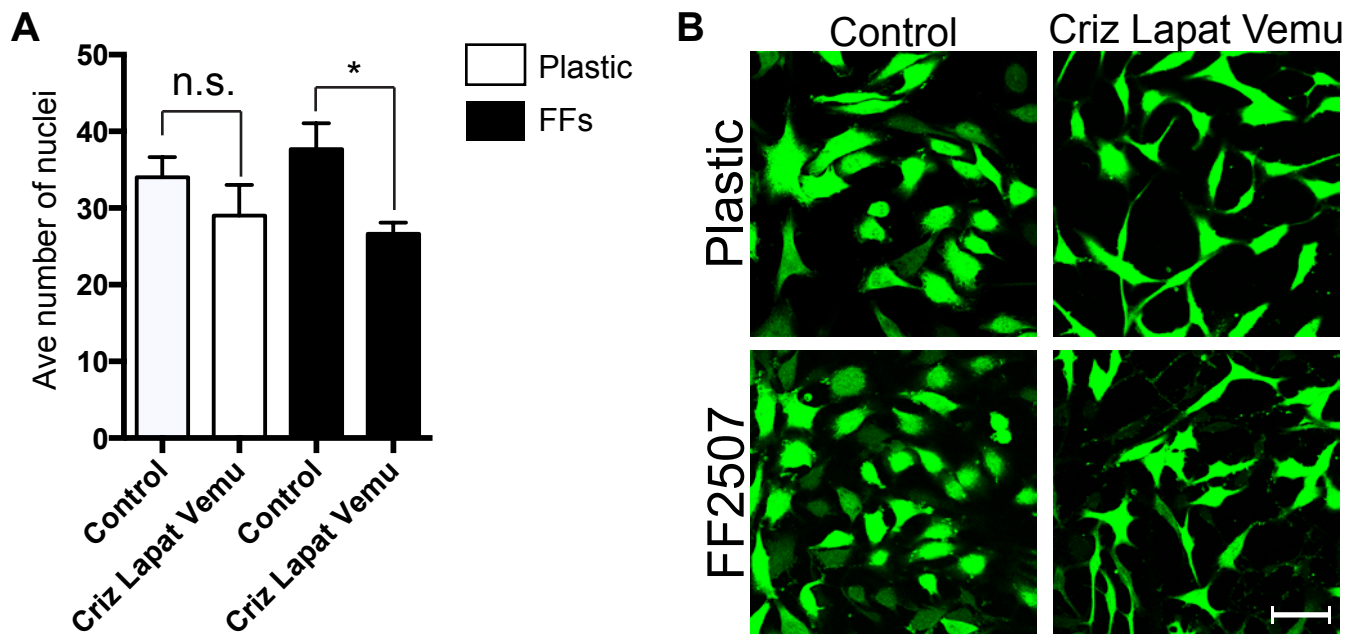

**Supplementary Figure 6. Melanoma cell proliferation with triple inhibition of BRAF, MET and HER2.** **A.** Melanoma cells treated with vehicle control or the combination of 3  $\mu$ M vemurafenib (BRAFi), 200 nM crizotinib (METi), and 1  $\mu$ M lapatinib (HER2i). Cells were plated either on cell culture plastic or a confluent monolayer of FF2507 fibroblasts and treated for 24 hours prior to analysis of cell counts. The average number of GFP+ nuclei in each treatment using Definiens® Developer v2.0 software suite. **B.** Representative images of GFP+ melanoma cells from A. Scale bar = 50  $\mu$ m.

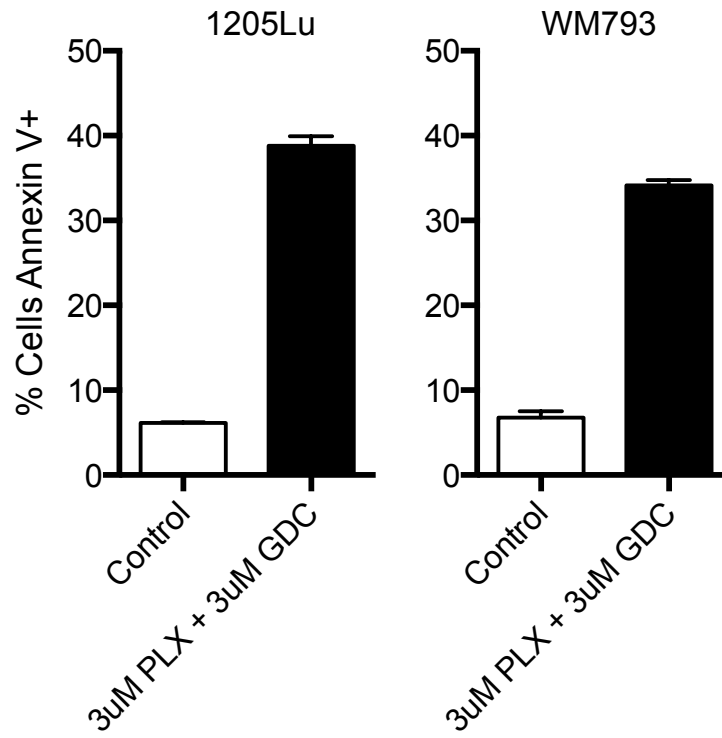

**Supplementary Figure 7. The effects of BRAFi+PI3Ki combination on plastic.** Melanoma cells were plated on cell culture plastic overnight and treated with vehicle control or the combination of 3 µM vemurafenib (BRAFi) and 3 µM GDC-0941 (PI3Ki) for 72 hours before being stained for annexin-V and analyzed by flow cytometry.
